# Supplementary material
Source: ML conference proceedings conference paper supplement (https://proceedings.neurips.cc/paper_files/paper/2017/hash/62889e73828c756c961c5a6d6c01a463-Abstract.html)
Supplement: Supplementary file [file 62889e73828c756c961c5a6d6c01a463-Supplemental.zip]

# Appendices

## A Test Statistic in Equation (4)

The null hypothesis  $H_{0,Y,S}^{ij}$  can be written in the following matrix form:  $\mathbf{C}\beta = 0$  where  $\mathbf{C}$  is a  $|S| \times (2|S|)$  matrix such that non-zero entries of  $\mathbf{C}$  are  $[\mathbf{C}]_{k,k} = 1$ ,  $[\mathbf{C}]_{k,k+|S|} = -1$ , for all  $1 \leq k \leq |S|$ , and  $\beta$  is a  $(2|S|) \times 1$  vector which is equal to  $\begin{bmatrix} \beta_S^{(i)}(Y) \\ \beta_S^{(j)}(Y) \end{bmatrix}$ .

The hypothesis tests in the form of  $\mathbf{C}\beta = 0$  can be performed by  $F$ -tests (see Section 3.6 and Appendix C.7 in [18]). In particular, for the null hypothesis  $H_{0,Y,S}^{ij}$ , the following statistic

$$(\hat{\beta}_S^{(i)}(Y) - \hat{\beta}_S^{(j)}(Y))^T (\mathbf{C}\hat{\Sigma}\mathbf{C}^T)^{-1} (\hat{\beta}_S^{(i)}(Y) - \hat{\beta}_S^{(j)}(Y)) / |S| \quad (6)$$

has a  $F(|S|, n - |S|)$  distribution where  $\hat{\Sigma} = [s_i^2 \hat{\Sigma}_i^{-1}, \mathbf{0}_{|S| \times |S|}; \mathbf{0}_{|S| \times |S|}, s_j^2 \hat{\Sigma}_j^{-1}]$ . Since  $\mathbf{C}\hat{\Sigma}\mathbf{C}^T = s_i^2 \hat{\Sigma}_i^{-1} + s_j^2 \hat{\Sigma}_j^{-1}$ , the above statistic is equal to (4).

## B Proof of Lemma 1

In a given environment  $E_i$ , for any set  $S \subseteq N(Y)$ , using representation (2), we have:

$$\begin{aligned} Y &= \sum_{k: X_k \in AN(Y) \setminus \{Y\}} c_k N_k + N_Y, \\ X_S \beta_S^{(i)}(Y) &= \sum_{k: X_k \in AN(Y) \setminus \{Y\}} b_k^{(i)} N_k + \sum_{k: X_k \in AN(S_{CH}) \setminus AN(Y)} b_k^{\prime(i)} N_k + b_Y^{(i)} N_Y, \end{aligned}$$

where  $S_{CH} := S \cap CH(Y)$  and the ancestral set  $AN(X)$  of a variable  $X$  consists of  $X$  and all the ancestors of nodes in  $X$ . Therefore

$$Y - X_S \beta_S^{(i)}(Y) = \sum_{k: X_k \in AN(Y) \setminus \{Y\}} (c_k - b_k^{(i)}) N_k - \sum_{k: X_k \in AN(S_{CH}) \setminus AN(Y)} b_k^{\prime(i)} N_k + (1 - b_Y^{(i)}) N_Y,$$

If the variance of  $N_Y$  is not changed, then for the choice of  $S = PA(Y)$ , the second summation vanishes, and in the first summation, we have:  $c_k = b_k^{(i)}$  for all  $X_k \in AN(Y) \setminus \{Y\}$  and  $b_Y^{(i)} = 0$  due to regressing  $Y$  on its parents. Therefore, the variance of residual remains unvaried. Otherwise, if the variance of  $N_Y$  changes across two environments, then this change may cancel out only for specific values of the variances of other exogenous noises, which according to a similar reasoning as the one in Assumption 1, we assume that this case does not happen.

## C Proof of Lemma 2

Suppose  $X$  is the parent of  $Y$ . Consider environments  $E_i, E_j \in \mathcal{E}$ . It suffices to show that if  $\beta_Y^{(i)}(X) = \beta_Y^{(j)}(X)$ , then  $\beta_X^{(i)}(Y) = \beta_X^{(j)}(Y)$ . Using representation (2),  $X$  and  $Y$  can be expressed as follows

$$\begin{aligned} X &= \sum_{k: X_k \in AN(X)} a_k N_k, \\ Y &= \sum_{k: X_k \in AN(X)} b_k N_k + \sum_{k: X_k \in AN(Y) \setminus AN(X)} c_k N_k. \end{aligned}$$

Hence we have

$$\begin{aligned}
\mathbb{E}[X^2] &= \sum_{k: X_k \in AN(X)} a_k^2 \text{var}(N_k), \\
\mathbb{E}[Y^2] &= \sum_{k: X_k \in AN(X)} b_k^2 \text{var}(N_k) + \sum_{k: X_k \in AN(Y) \setminus AN(X)} c_k^2 \text{var}(N_k), \\
\mathbb{E}[XY] &= \sum_{k: X_k \in AN(X)} a_k b_k \text{var}(N_k).
\end{aligned}$$

Therefore

$$\begin{aligned}
\beta_X(Y) &= \frac{\sum_{k: X_k \in AN(X)} a_k b_k \text{var}(N_k)}{\sum_{k: X_k \in AN(X)} a_k^2 \text{var}(N_k)} \\
\beta_Y(X) &= \frac{\sum_{k: X_k \in AN(X)} a_k b_k \text{var}(N_k)}{\sum_{k: X_k \in AN(X)} b_k^2 \text{var}(N_k) + \sum_{k: X_k \in AN(Y) \setminus AN(X)} c_k^2 \text{var}(N_k)}
\end{aligned}$$

in the expression for  $\beta_Y(X)$ , the first summation contains the same exogenous noises as the numerator while the second summation contains terms related to the variance of other orthogonal exogenous noises. Therefore, by Assumption 1,  $\beta_Y^{(i)}(X) = \beta_Y^{(j)}(X)$  only if for all  $k : X_k \in AN(Y)$ ,  $\text{var}(N_k)$  remains unchanged. In this case, we will also have  $\beta_X^{(i)}(Y) = \beta_X^{(j)}(Y)$ . Note that  $\beta_X(Y)$  can always remain unchanged if the exogenous noise of variables in  $AN(X)$  affect  $Y$  only through  $X$ .
